# MicroRNA-130a alleviates human coronary artery endothelial cell injury and inflammatory responses by targeting PTEN via activating PI3K/Akt/eNOS signaling pathway

Chun-Li Song<sup>1</sup>, Bin Liu<sup>1</sup>, Yong-Feng Shi<sup>1</sup>, Ning Liu<sup>1</sup>, You-You Yan<sup>1</sup>, Ji-Chang Zhang<sup>1</sup>, Xin Xue<sup>1</sup>, Jin-Peng Wang<sup>1</sup>, Zhuo Zhao<sup>1</sup>, Jian-Gen Liu<sup>1</sup>, Yang-Xue Li<sup>1</sup>, Xiao-Hao Zhang<sup>1</sup>, Jun-Duo Wu<sup>1</sup>

<sup>1</sup>Department of Cardiology, The Second Hospital of Jilin University, Changchun 130041, Jilin Province, China

**Correspondence to:** Chun-Li Song, **email:** singersongchunli@163.com

**Keywords:** *microRNA-130a*, *PTEN*, *PI3K/Akt/eNOS signaling pathway*, *coronary artery endothelial cells*, *cell injury*

**Received:** June 29, 2016

**Accepted:** September 21, 2016

**Published:** October 04, 2016

## ABSTRACT

Our study aims to investigate the roles of microRNA-130a (miR-130a) in human coronary artery endothelial cells (HCAECs) injury and inflammatory responses by targeting PTEN through the PI3K/Akt/eNOS signaling pathway. HCAECs were treated with 1.0 mmol/L homocysteine (HCY) and assigned into eight groups: the blank group, the negative control (NC) group, the miR-130a mimics group, the miR-130a inhibitors group, the si-PTEN group, the Wortmannin group, the miR-130a inhibitors + si-PTEN group and the miR-130a mimics + Wortmannin group. Luciferase reporter gene assay was used to validate the relationship between miR-130a and PTEN. The expressions of miR-130a, PTEN and PI3K/Akt/eNOS signaling pathway-related proteins were detected by qRT-PCR assay and Western blotting. MTT assay and Hoechst 33258 staining were adopted to testify cell growth and apoptosis. The NO kit assay was used to detect the NO release. ELISA was conducted to measure serum cytokine levels. Luciferase reporter gene assay confirmed the target relationship between miR-130a and PTEN. Compared with the blank and NC groups, the miR-130a mimics and si-PTEN groups showed significant increases in the expressions of PI3K/Akt/eNOS signaling pathway-related proteins, cell viability and the NO release, while serum cytokine levels and cell apoptosis were decreased; by contrast, an opposite trend was observed in miR-130a inhibitors and Wortmannin groups. However, no significant difference was found in the miR-130a inhibitors + si-PTEN and miR-130a mimics + Wortmannin groups when compared with the blank group. These results indicate that miR-130a could alleviate HCAECs injury and inflammatory responses by down-regulating *PTEN* and activating PI3K/Akt/eNOS signaling pathway.

## INTRODUCTION

Endothelial cells (ECs) have a vigorous ability to grow and are involved in angiogenesis, which comprises both neovascularization and the maintenance of intimal layer integrity [1]. The proliferation of ECs plays an important role in angiogenesis, which is a physiological or pathological neovascularization process that occurs under certain conditions, such as tissue ischemia [2]. ECs have also play a critical role in the vascular and inflammatory responses, and the activation of inflammatory in ECs is the key to the development of many vascular diseases, such as vascular permeability and endothelial hyper-permeability [3, 4]. ECs

can secrete a variety of vasoactive substances, such as ET and nitric oxide (NO), which can participate in various signaling pathways, thereby regulating endothelial function [5, 6]. It has been demonstrated that activation of the PI3K/Akt pathway and the eNOS/NO pathway are closely associated with vascular remodeling and angiogenesis [7]. Previous evidence has reported that the activation of the PI3K/Akt/eNOS signaling pathway can promote NO release and thus inhibit pro-inflammatory cytokines production [8, 9].

MicroRNA-130a (miR-130a) is located at chromosome 11q12, close to the 11q13 area [10]. It has been proposed that miR-130a can promote the proliferation, migration and tube formation of vascular endothelial cells [11]. MiR-130a has

recently been found to be involved in many critical processes in multiple types of human diseases, including ventricular arrhythmias, endothelial progenitor cell dysfunction and hepatic insulin sensitivity [12–15]. Homocysteine (HCY) is capable of inducing the apoptosis in endothelial cells, and it could be an essential mechanism for development of cardiovascular diseases [16]. Previous studies have demonstrated that miRs are involved in several HCY-induced cardiovascular dysfunctions, including cardiac remodeling and stroke [17, 18]. The physiological function of phosphatase and tensin homologue (PTEN), a lipid phosphatase, is a frequently mutated tumor suppressor gene that opposes the PI3K/AKT pathway through dephosphorylation of phosphoinositide-3,4,5-triphosphate [19, 20]. In the present study, we aim to investigate the roles of miR-130a in HCAECs injury and inflammatory responses by targeting PTEN through the PI3K/Akt/eNOS signaling pathway.

## RESULTS

### The relationship between miR-130a and PTEN

The target site related to PTEN and miR-130a was determined via Target Scan software ([http://www.targetscan.org/vert\\_61/](http://www.targetscan.org/vert_61/)). Figure 1 showed the 3'-UTR primers of miR-130a binding site with PTEN mRNA. In order to prove that the change of luciferase activity was caused by binding site predicted by the miR-130a, we also

designed the mutant and wild sequences which were loss the miR-130a binding site in PTEN 3'UTR, and inserted into reporter plasmid. The 293T cell was co-transfected with different plasmids (PTEN wild group, PTEN mutant group, PTEN wild/miR-130a group and PTEN mutant/miR-130a group). Luciferase activity was conducted for testing, and the result showed that compared with the other transfection groups, PTEN wild/miR-130a group showed lower luciferase activity (all  $P < 0.05$ ). MiR-130a can specifically inhibit the expression of UTR 3' region of PTEN.

### Effects of different doses of HCY on cell viability of HCAECs

After treatment with different doses of HCY for 24 h, 48 h and 72 h, the activation of HCAECs was detected using an MTT assay. The results showed that the activation of HCAECs receiving HCY concentrations of 0.1, 0.25, 0.5 or 1.0 mmol/L was decreased, and in 24 h, a significant difference was found between the proliferation rate of HCAECs treated with HCY concentrations of 0.5 and 1.0 mmol/L and that of the control group (HCY concentration 0 mmol/L) (both  $P < 0.01$ ). Compared with the control group (0 mmol/L), the cell proliferation rates after HCY treatment (0.25, 0.5 and 1.0 mmol/L) were significantly different at 48 h (all  $P < 0.05$ ). Compared with the control group (0 mmol/L), the cell proliferation

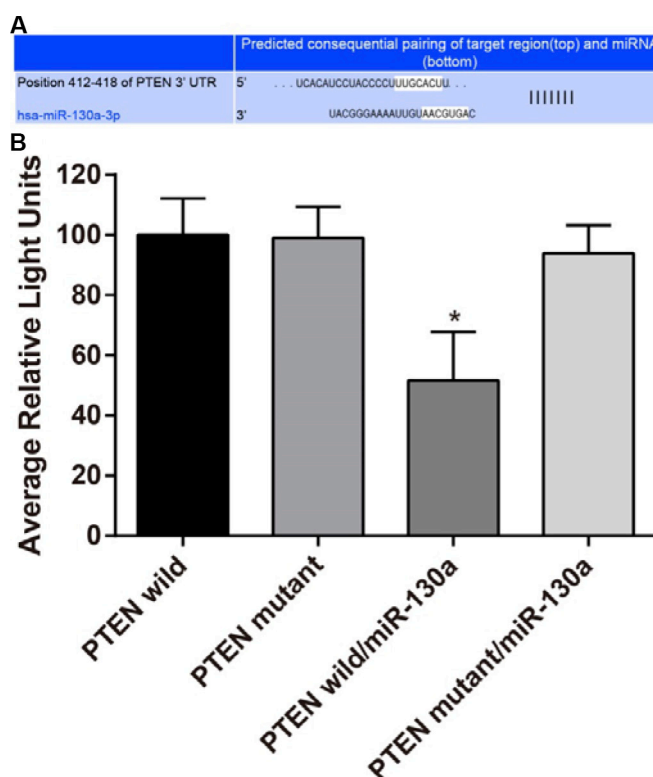

**Figure 1: MiR-130a directly target at PTEN.** (A) Target Scan used for predicting the 3'-UTR primers of miR-130a binding site with PTEN mRNA; (B) Dual luciferase reporter gene activity assay. Note: PTEN, phosphatase and tensin homologue deleted on chromosome 10; \* $P < 0.05$  compared with the PTEN wild.

rates after HCY treatment (0.1, 0.25, 0.5 and 1.0 mmol/L) were significantly different at 48 h (all  $P < 0.05$ ) (Figure 2).

### Effects of different doses of HCY on cell apoptosis of HCAECs

Hoechst 33258 is a nucleic acid-specific dye. The nuclei in normal cells presented uniformly hypochromatic blue color, and the nuclei in apoptotic cells presented a series of typical apoptosis characteristics, such as pyknosis, chromatin enrichment and apoptotic bodies (Figure 3A). After treatment with different doses of HCY (0.1, 0.25, 0.5 and 1.0 mmol/L) for 24 h, the apoptosis rates ( $12.8 \pm 2.5\%$ ,  $17.4 \pm 2.8\%$ ,  $20.5 \pm 3.6\%$ ,  $27.8 \pm 4.7\%$ , respectively) were significantly increased compared with the apoptosis rate ( $6.9 \pm 2.1\%$ ) in the control group (0 mmol/L) (all  $P < 0.05$ ) (Figure 3B).

### Effects of different doses of HCY on the release of NO in HCAECs

A NO kit was used to detect the NO content in the cell supernatant. The results showed that the concentrations of NO were  $24.58 \pm 3.52$  mmol/L,  $21.74 \pm 3.02$  mmol/L,  $19.02 \pm 2.65$  mmol/L,  $14.23 \pm 2.36$  mmol/L, respectively, after treatment with different doses of HCY (0.1, 0.25, 0.5 and 1.0 mmol/L), which were lower than the concentration of NO ( $33.65 \pm 4.08$  mmol/L) in the control group (0 mmol/L) (all  $P < 0.05$ ) (Figure 4).

### Effects of different doses of HCY on serum cytokine levels in HCAECs

The ICAM-1 and IL-6 content in HCAECs treated with different doses of HCY (0.1, 0.25, 0.5 and 1.0 mmol/L) was detected by ELISA. The results showed

that with increasing HCY concentrations, the ICAM-1, IL-6, IFN- $\gamma$ , IL-1 $\beta$ , TNF- $\alpha$ , IL-12 and IL-17 contents in HCAECs increased gradually. The IL-6, ICAM-1, IFN- $\gamma$ , IL-1 $\beta$ , TNF- $\alpha$ , IL-12 and IL-17 contents in HCAECs treated with HCY at concentrations of 0.25, 0.5 and 1.0 mmol/L were significantly different than those of the control group (0 mmol/L), except for the 0.1 mmol/L HCY condition (all  $P < 0.05$ ) (Table 1).

### Effects of different doses of HCY on miR-130a and PTEN mRNA expressions in HCAECs

Compared with the control group (0 mmol/L), the relative expression of miR-130a in the cell supernatant of HCY-treated cells was decreased while the expression of PTEN mRNA was increased. The relative expressions of miR-130a in the supernatants of cells treated with HCY at concentrations of 0.25, 0.5 and 1.0 mmol/L were significantly lower while the expression of PTEN mRNA was higher than those in the control group (0 mmol/L), except for the 0.1 mmol/L HCY condition ( $P < 0.05$ ), and the content of miR-130a in the cell supernatant decreased with increasing HCY concentrations while the expression of PTEN mRNA increased with increasing HCY concentrations (both  $P < 0.05$ ) (Figure 5).

### Effects of different doses of HCY on the expressions of PTEN and PI3K-Akt-eNOS signaling pathway-related proteins in HCAECs

As shown in Figure 6, the mRNA expressions of miR-130a, PTEN, PI3K, AKT and eNOS in HCAECs of each group were detected by qRT-PCR. The results demonstrated that compared with the blank and the NC groups, the mRNA expressions of miR-130a in the miR-130a mimics and the miR-130a mimics +Wortmannin groups were significantly increased while were significantly

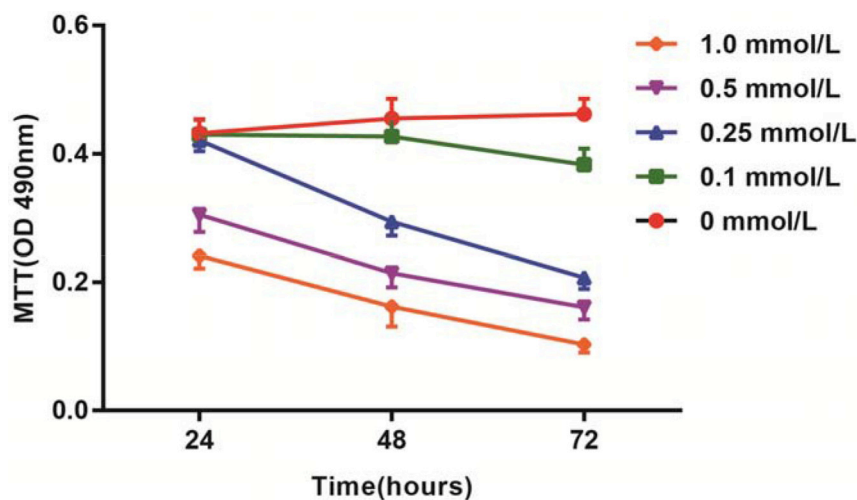

**Figure 2:** Effects of different doses (0, 0.1, 0.25, 0.5 and 1.0 mmol/L) of HCY on cell activity of HCAECs. Note: HCY, homocysteine; HCAECs, human coronary artery endothelial cells.

**Table 1: Effect of different concentrations of HCY on inflammatory cytokines secreted by HCAECs**

| HCY concentration (mmol/L) | IL-6 (pg/ml)      | ICAM-1 (ng/ml)    | IFN- $\gamma$ (pg/ml) | IL-1 $\beta$ ' (pg/ml) | TNF- $\alpha$ (pg/ml) | IL-12 (pg/ml)      | IL-17 (pg/ml)     |
|----------------------------|-------------------|-------------------|-----------------------|------------------------|-----------------------|--------------------|-------------------|
| 0                          | 10.25 $\pm$ 4.18  | 4.24 $\pm$ 1.34   | 28.86 $\pm$ 3.64      | 1.36 $\pm$ 0.47        | 1.85 $\pm$ 0.79       | 11.43 $\pm$ 4.67   | 3.93 $\pm$ 1.45   |
| 0.1                        | 12.64 $\pm$ 4.72  | 5.37 $\pm$ 2.45   | 30.74 $\pm$ 4.39      | 1.67 $\pm$ 0.56        | 2.04 $\pm$ 0.90       | 14.90 $\pm$ 4.82   | 4.25 $\pm$ 1.33   |
| 0.25                       | 30.14 $\pm$ 5.02* | 13.24 $\pm$ 3.08* | 42.63 $\pm$ 3.95*     | 2.79 $\pm$ 1.23*       | 5.26 $\pm$ 1.27*      | 37.47 $\pm$ 7.65*  | 6.68 $\pm$ 2.02*  |
| 0.5                        | 41.32 $\pm$ 5.89* | 16.21 $\pm$ 3.21* | 55.48 $\pm$ 4.67*     | 4.31 $\pm$ 1.28*       | 7.14 $\pm$ 2.16*      | 51.38 $\pm$ 8.44*  | 8.59 $\pm$ 2.61*  |
| 1                          | 57.88 $\pm$ 7.66* | 21.33 $\pm$ 3.64* | 70.15 $\pm$ 5.01*     | 6.47 $\pm$ 1.59*       | 11.56 $\pm$ 3.73*     | 71.24 $\pm$ 10.52* | 12.76 $\pm$ 4.18* |

Notes: HCY, homocysteine; IL-6, interleukin-6; ICAM-1, Intercellular Adhesion Molecule 1; IFN- $\gamma$ , interferon- $\gamma$ ; IL-1 $\beta$ , Interleukin-1 $\beta$ ; TNF- $\alpha$ , interferon- $\alpha$ ; IL-12, interleukin-12; IL-17, interleukin-17; HCAECs: human coronary artery endothelial cells; \*: compared with the control group (0 mmol/L),  $P < 0.05$ .

decreased in the miR-130a inhibitors and the miR-130a inhibitors + si-PTEN groups (all  $P < 0.05$ ). Compared with the blank and the NC groups, the mRNA expressions of PTEN in the miR-130a mimics, the si-PTEN and the miR-130a mimics + Wortmannin groups were significantly increased while were significantly decreased in the miR-130a inhibitors group (all  $P < 0.05$ ). No significant difference was found in the mRNA expression of PTEN between the Wortmannin and the miR-130a inhibitors + si-PTEN groups ( $P > 0.05$ ). The mRNA expressions of PI3K were significantly higher in the miR-130a mimics and the si-PTEN groups while were significantly lower in the miR-130a inhibitors and the Wortmannin groups when compared with those in the blank and the NC groups (all  $P < 0.05$ ). Compared with the miR-130a inhibitors + si-PTEN group, the mRNA expression of PI3K was lower in the miR-130a inhibitors group while were higher in the si-

PTEN group (both  $P < 0.05$ ). Compared with the miR-130a mimics + Wortmannin group, the mRNA expression of PI3K was higher in the miR-130a mimics group while were lower in the Wortmannin group (both  $P < 0.05$ ). However, no significant difference was found in the mRNA expressions of AKT and eNOS among cells in each group (all  $P > 0.05$ ).

Western blotting analysis revealed that the p-PI3K, p-Akt, p-eNOS, p-PI3K/PI3K, p-Akt/Akt and p-eNOS/eNOS were gradually decreased, and the PTEN was gradually increased in HCAECs treated with different doses of HCY (0.1, 0.25, 0.5 and 1.0 mmol/L), and a significant difference was found compared with the control group (0 mmol/L) (all  $P < 0.05$ ). Based on the above results, the high level of HCY was an independent risk factor for coronary heart disease (CHD), and miR-130a expression was decreased, and PTEN expression was increased in HCAECs treated with high concentrations of

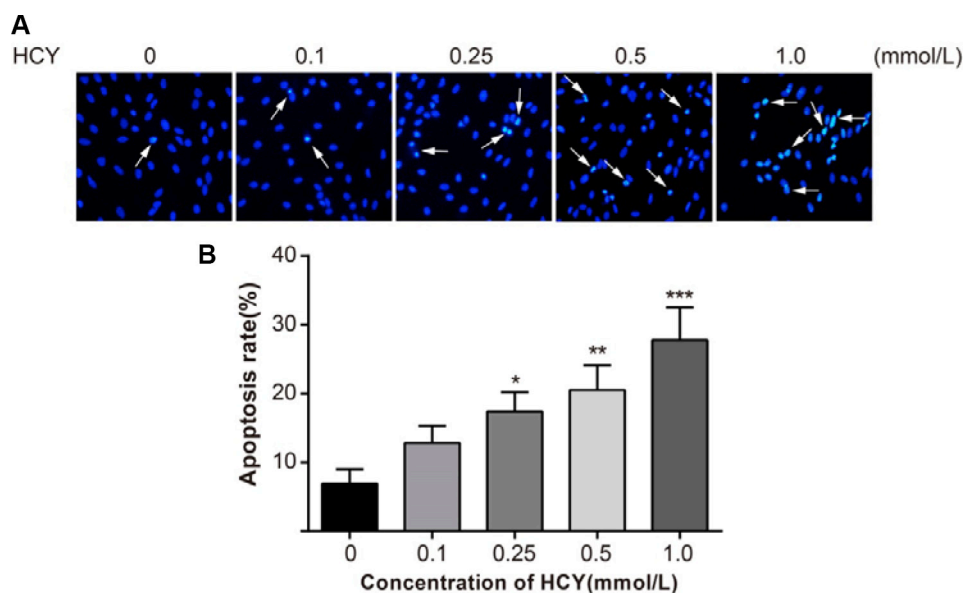

**Figure 3: Effect of different doses (0, 0.1, 0.25, 0.5 and 1.0 mmol/L) of HCY on cell apoptosis of HCAECs.** (A) A series of typical apoptosis characteristics of HCAECs, such as chromatin enrichment and apoptotic body after treating by difference concentrations of HCY ( $\times 200$ ); (B) The effects of different doses (0, 0.1, 0.25, 0.5 and 1.0 mmol/L) of HCY on apoptosis of HCAECs, compared with the control group (0 mmol/L). Note: HCY, homocysteine; HCAECs, human coronary artery endothelial cells; \* $P < 0.05$ , \*\* $P < 0.01$ , \*\*\* $P < 0.001$ .

HCY, which then inhibited the PI3K-Akt-eNOS signaling pathway. Thus, for the following experiments treatment of HCAECs with 1.0 mmol/L HCY or PBS was used to further explore whether miR-130a promoted the function of the PI3K/Akt/eNOS signaling pathway in HCAEC injury and HCAEC-mediated inflammation via targeting PTEN (Figure 7 and Table 2).

### Comparisons of the expressions of miR-130a, PTEN and the PI3K/Akt/eNOS signaling pathway-related proteins in HCAECs among eight groups

Western blotting analysis results demonstrated that compared with the blank and the NC groups, the protein expressions of PTEN were significantly increased in the miR-130a mimics, si-PTEN and miR-130a mimics +Wortmannin groups, and the protein expression of PTEN

was significantly decreased in the miR-130a inhibitors group (all  $P < 0.05$ ), while no significant difference was found between the Wortmannin group and the miR-130a inhibitors + si-PTEN group ( $P > 0.05$ ). Compared with the blank and the NC groups, the protein expressions of PI3K, p-PI3K, p-Akt, and p-eNOS and the ratios of p-PI3K/PI3K, p-Akt/Akt and p-eNOS/eNOS were higher in the miR-130a mimics and the si-PTEN group while were lower in the miR-130a inhibitors and the Wortmannin group (all  $P < 0.05$ ). Compared with the miR-130a inhibitors + si-PTEN group, the protein expressions of PI3K, p-PI3K, p-Akt, and p-eNOS and the ratios of p-PI3K/PI3K, p-Akt/Akt and p-eNOS/eNOS were significantly decreased in the miR-130a inhibitors group while increased in the si-PTEN group (all  $P < 0.05$ ). Compared with the miR-130a mimics +Wortmannin group, the protein expressions of PI3K, p-PI3K, p-Akt, and p-eNOS and the ratios of p-PI3K/PI3K, p-Akt/Akt and p-eNOS/eNOS were significantly increased in the miR-

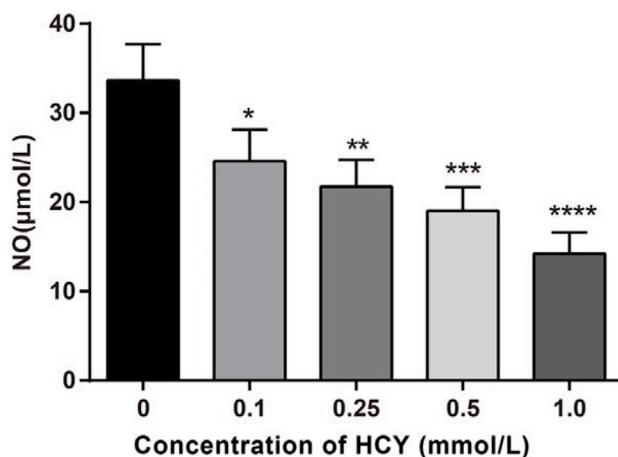

**Figure 4:** Effect of different doses (0, 0.1, 0.25, 0.5 and 1.0 mmol/L) of HCY on the release of NO of HCAECs. Note: HCY, homocysteine; HCAECs, human coronary artery endothelial cells; NO, Nitric oxide; compared with the control group (0 mmol/L), \* $P < 0.05$ , \*\* $P < 0.01$ , \*\*\* $P < 0.001$ , \*\*\*\* $P < 0.0001$ .

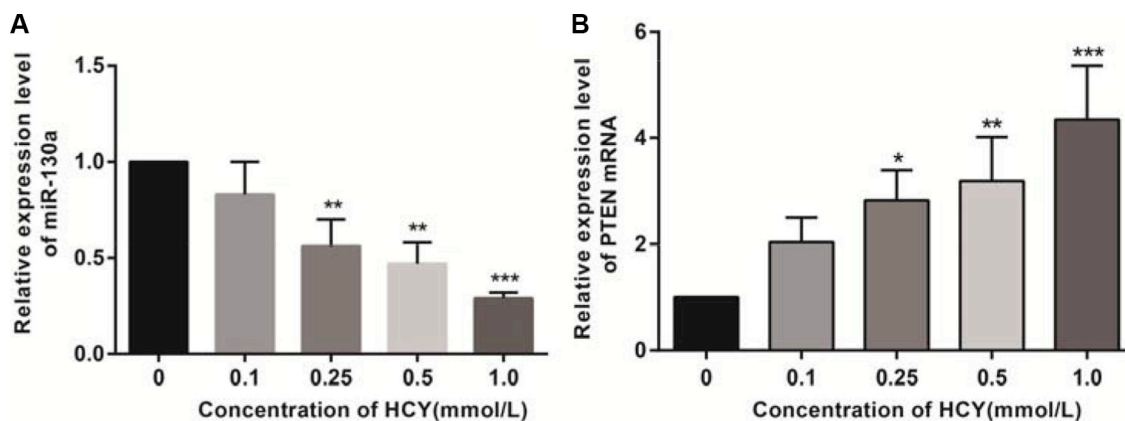

**Figure 5:** Effect of different doses (0, 0.1, 0.25, 0.5 and 1.0 mmol/L) of HCY on the expressions of miR-130a and PTEN mRNA in HCAEC cells detected by RT-qPCR. (A) Effect of different doses (0, 0.1, 0.25, 0.5 and 1.0 mmol/L) of HCY on the relative expression of miR-130a in HCAEC cells; (B) Effect of different doses (0, 0.1, 0.25, 0.5 and 1.0 mmol/L) of HCY on the relative expression of PTEN mRNA in HCAEC cells. Note: HCY, homocysteine; HCAECs, human coronary artery endothelial cells; PTEN, phosphatase and tensin homolog deleted on chromosome 10; compared with the control group (0 mmol/L), \*\* $P < 0.01$ , \*\*\* $P < 0.001$ .

**Table 2: Effects of different concentrations (0, 0.1, 0.25, 0.5 and 1.0 mmol/L) of HCY on expressions of PTEN, key molecules of PI3K-Akt-eNOS signaling pathway and its phosphorylated proteins in HCAECs**

| HCY concentration (mmol/L) | PTEN         | p-PI3K       | PI3K        | p-Akt        | Akt         | p-eNOS       | eNOS        | p-PI3K/PI3K    | p-Akt/Akt      | p-eNOS/eNOS    |
|----------------------------|--------------|--------------|-------------|--------------|-------------|--------------|-------------|----------------|----------------|----------------|
| 0                          | 5.26 ± 1.83  | 3.15 ± 0.29  | 4.02 ± 0.54 | 2.66 ± 0.21  | 3.34 ± 0.20 | 2.78 ± 0.35  | 3.41 ± 0.31 | 0.786 ± 0.034  | 0.796 ± 0.013  | 0.813 ± 0.028  |
| 0.1                        | 6.08 ± 1.95  | 2.46 ± 0.25* | 3.91 ± 0.41 | 1.88 ± 0.18* | 3.56 ± 0.36 | 1.97 ± 0.28* | 3.24 ± 0.28 | 0.631 ± 0.074* | 0.528 ± 0.002* | 0.606 ± 0.033* |
| 0.25                       | 7.27 ± 1.88* | 1.80 ± 0.22* | 3.88 ± 0.43 | 1.68 ± 0.27* | 3.48 ± 0.38 | 1.52 ± 0.24* | 3.19 ± 0.24 | 0.465 ± 0.048* | 0.474 ± 0.053* | 0.478 ± 0.087* |
| 0.5                        | 7.93 ± 2.14* | 1.35 ± 0.23* | 3.89 ± 0.36 | 1.26 ± 0.25* | 3.53 ± 0.18 | 1.12 ± 0.21* | 3.21 ± 0.33 | 0.344 ± 0.028* | 0.355 ± 0.054* | 0.347 ± 0.029* |
| 1                          | 9.13 ± 2.30* | 1.01 ± 0.18* | 3.85 ± 0.37 | 0.81 ± 0.24* | 3.31 ± 0.27 | 0.68 ± 0.18* | 3.15 ± 0.41 | 0.262 ± 0.022* | 0.243 ± 0.075* | 0.214 ± 0.026* |

Notes: HCY: Homocysteine; HCAECs: Coronary artery endothelial cells; PTEN; Phosphatase and tensin homolog; PI3K, Phosphatidylinositol 3-kinase; Akt, Protein kinase B; eNOS, endothelial nitric oxide synthase; \*: compared with the control group (0 mmol/L),  $P < 0.05$ .

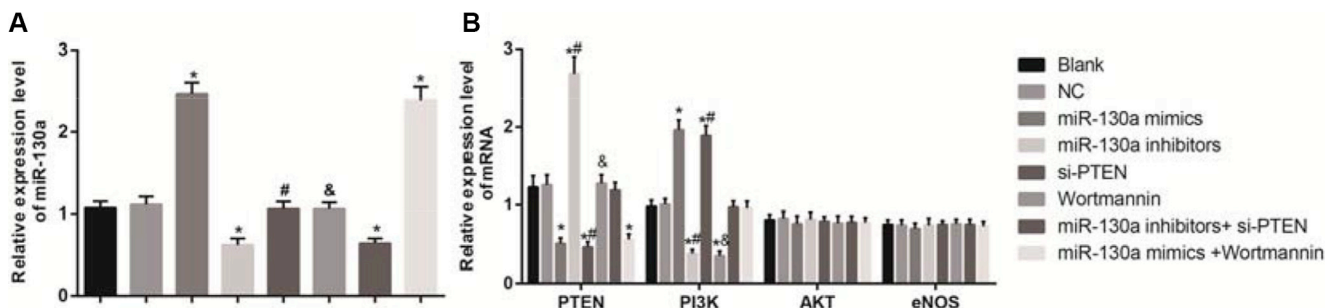

**Figure 6: Effects of different doses (0, 0.1, 0.25, 0.5 and 1.0 mmol/L) of HCY on the mRNA expressions of miR-130 and key molecules of PI3K-Akt-eNOS signaling pathway in HCAECs detected by qRT-PCR.** Note: (A) the mRNA expressions of miR-130 in HCAECs detected by qRT-PCR; B, the mRNA expressions of PTEN and the key molecules of PI3K-Akt-eNOS signaling pathway in HCAECs detected by qRT-PCR; HCAECs, Human coronary artery endothelial cells; HCY, homocysteine; PTEN, phosphatase and tensin homolog deleted on chromosome 10; PI3K, phosphatidylinositol 3-kinase; Akt: protein kinase B; eNOS: endothelial nitric oxide synthase; compared with the blank and the NC groups,  $*P < 0.05$ ; compared with the miR-130a inhibitors + si-PTEN group,  $\#P < 0.05$ ; compared with the miR-130a mimics + Wortmannin group,  $\&P < 0.05$ ).

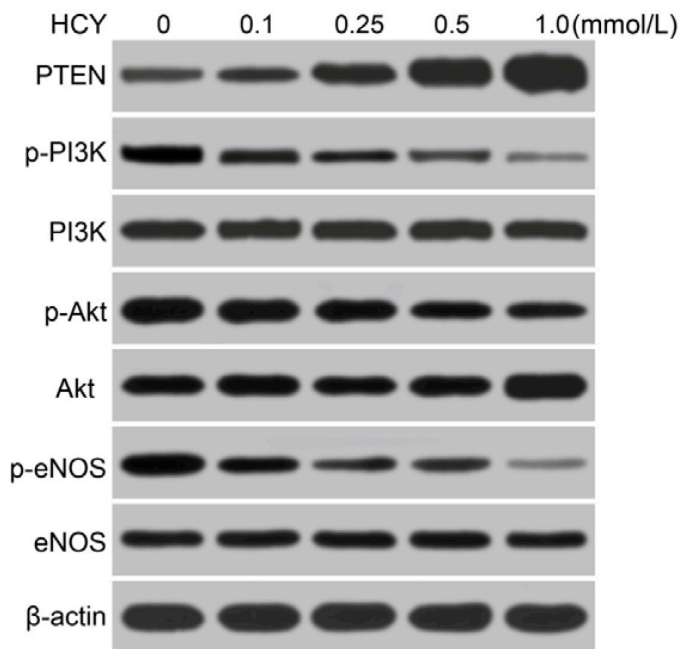

**Figure 7: Effects of different doses (0, 0.1, 0.25, 0.5 and 1.0 mmol/L) of HCY on the expressions of PTEN and the PI3K/Akt/eNOS signaling pathway-related proteins in HCAECs detected by Western blotting.** Note: HCAECs, Human coronary artery endothelial cells; HCY, homocysteine; PTEN, phosphatase and tensin homolog deleted on chromosome 10; PI3K, phosphatidylinositol 3-kinase; Akt: protein kinase B; eNOS: endothelial nitric oxide synthase.

130a mimics group while decreased in the Wortmannin group (all  $P < 0.05$ ). Compared with the blank and the NC groups, no significant difference was found for the protein expressions of PI3K, p-PI3K, p-Akt, and p-eNOS and the ratios of p-PI3K/PI3K, p-Akt/Akt and p-eNOS/eNOS in the miR-130a inhibitors + si-PTEN and the miR-130a mimics +Wortmannin groups (Figure 8 and Table 3).

### Comparisons of the proliferation of HCAECs among eight groups

MTT assay revealed that compared with the blank and the NC groups, the cell activities at 24 h, 48 h and 72 h were higher in the miR-130a mimics and si-PTEN groups while were lower in the miR-130a inhibitors and the Wortmannin groups (all  $P < 0.05$ ). The cell activity in the miR-130a mimics group was higher while in the Wortmannin group was lower than that in the miR-130a mimics +Wortmannin group ( $P < 0.05$ ). The cell activity in the miR-130a inhibitors group was lower while in the si-PTEN group was higher than that in the miR-130a inhibitors + si-PTEN group ( $P < 0.05$ ) (Figure 9).

### Comparisons of the apoptosis of HCAECs among eight groups

Hoechst 33258 staining showed that compared with the blank and the NC groups, the apoptotic rates were decreased in the miR-130a mimics and the si-PTEN

groups while were increased in the miR-130a inhibitors and the Wortmannin groups ( $P < 0.05$ ). No significant difference was found for the apoptotic rates in the miR-130a inhibitors + si-PTEN and the miR-130a mimics +Wortmannin groups in comparison to the blank and the NC groups ( $P > 0.05$ ). The apoptotic rate was higher in the miR-130a inhibitors group while was lower in the si-PTEN group than that in the miR-130a inhibitors + si-PTEN group ( $P < 0.05$ ). The apoptotic rate was lower in the miR-130a mimics group while was higher in the Wortmannin group than that in the miR-130a mimics +Wortmannin group ( $P < 0.05$ ) (Figure 10).

### Comparisons of the release of NO in HCAECs among eight groups

A NO kit was used for testing the NO content in Figure 11. No significant difference was found in the concentration of NO among the blank, NC, miR-130a inhibitors + si-PTEN and miR-130a mimics +Wortmannin groups (all  $P > 0.05$ ). Compared with the blank and the NC groups, the concentrations of NO were increased in the miR-130a mimics and the si-PTEN groups while were decreased in the miR-130a inhibitors and the Wortmannin groups (all  $P < 0.05$ ). Compared with the miR-130a inhibitors + si-PTEN group, the concentration of NO was decreased in the miR-130a inhibitors group while was increased in the si-PTEN group (both  $P < 0.05$ ). Compared with the miR-130a mimics +Wortmannin group, the

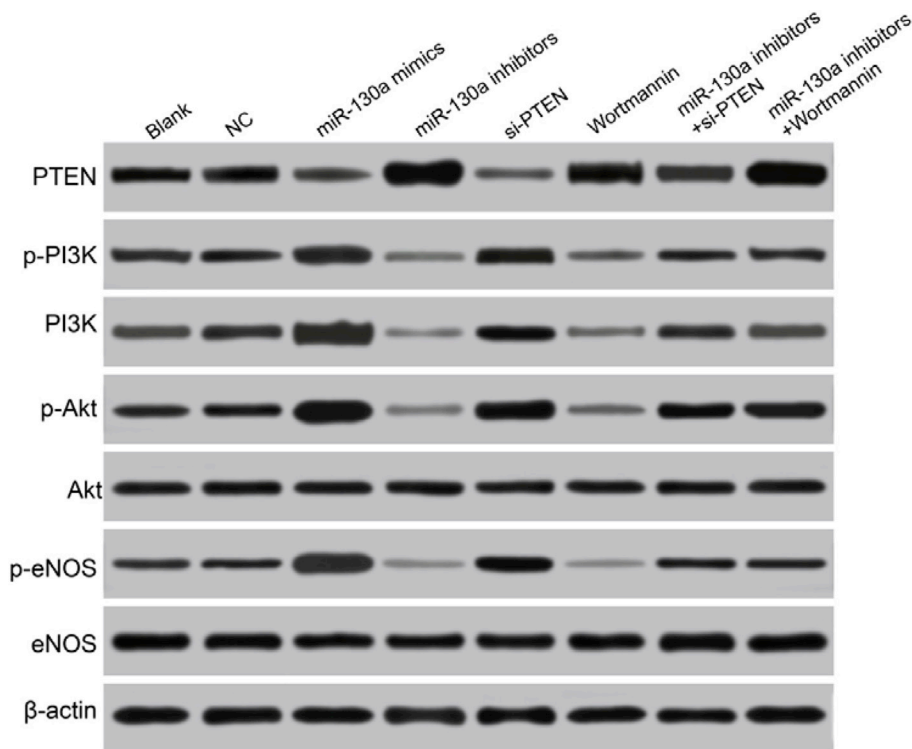

**Figure 8: Comparisons of the expressions of miR-130a, PTEN and the PI3K/Akt/eNOS signaling pathway-related proteins in HCAECs among eight groups.** Note: HCAECs, human coronary artery endothelial cells; PTEN, phosphatase and tensin homolog; PI3K, phosphatidylinositol 3-kinase; Akt, protein kinase B; eNOS, endothelial nitric oxide synthase.

**Table 3: Expressions of PTEN, key molecules of PI3K-Akt-eNOS signaling pathway and its phosphorylated proteins in HCAECs of each group**

| Group                         | PTEN                         | p-PI3K                        | PI3K                          | p-Akt                         | Akt         | p-eNOS                        | eNOS                          | p-PI3K/PI3K                     | p-Akt/Akt                       | p-eNOS/eNOS                     |
|-------------------------------|------------------------------|-------------------------------|-------------------------------|-------------------------------|-------------|-------------------------------|-------------------------------|---------------------------------|---------------------------------|---------------------------------|
| Blank                         | 1.59 ± 0.47                  | 0.73 ± 0.12                   | 1.63 ± 0.14                   | 0.56 ± 0.08                   | 1.14 ± 0.11 | 0.57 ± 0.09                   | 1.12 ± 0.11                   | 0.447 ± 0.035                   | 0.489 ± 0.028                   | 0.509 ± 0.057                   |
| NC                            | 1.52 ± 0.44                  | 0.79 ± 0.10                   | 1.67 ± 0.13                   | 0.58 ± 0.10                   | 1.18 ± 0.10 | 0.59 ± 0.10                   | 1.13 ± 0.10                   | 0.469 ± 0.025                   | 0.490 ± 0.046                   | 0.518 ± 0.049                   |
| miR-130a mimics               | 0.59 ± 0.20*                 | 1.58 ± 0.23* <sup>&amp;</sup> | 2.49 ± 0.18* <sup>&amp;</sup> | 0.87 ± 0.10* <sup>&amp;</sup> | 1.17 ± 0.13 | 0.95 ± 0.12* <sup>&amp;</sup> | 1.16 ± 0.12                   | 0.633 ± 0.048* <sup>&amp;</sup> | 0.744 ± 0.007* <sup>&amp;</sup> | 0.820 ± 0.016* <sup>&amp;</sup> |
| miR-130a inhibitors           | 2.02 ± 0.39* <sup>#</sup>    | 0.32 ± 0.07* <sup>#</sup>     | 0.57 ± 0.14* <sup>#</sup>     | 0.23 ± 0.05* <sup>#</sup>     | 1.18 ± 0.07 | 0.18 ± 0.06* <sup>#</sup>     | 1.13 ± 0.11* <sup>#</sup>     | 0.560 ± 0.018* <sup>#</sup>     | 0.194 ± 0.031* <sup>#</sup>     | 0.160 ± 0.037* <sup>#</sup>     |
| si-PTEN                       | 0.53 ± 0.17* <sup>#</sup>    | 1.62 ± 0.20* <sup>#</sup>     | 2.51 ± 0.21* <sup>#</sup>     | 0.92 ± 0.10* <sup>#</sup>     | 1.20 ± 0.11 | 0.97 ± 0.12* <sup>#</sup>     | 1.19 ± 0.13* <sup>#</sup>     | 0.644 ± 0.028* <sup>#</sup>     | 0.764 ± 0.011* <sup>#</sup>     | 0.817 ± 0.011* <sup>#</sup>     |
| Wortmannin                    | 1.63 ± 0.53 <sup>&amp;</sup> | 0.27 ± 0.08* <sup>&amp;</sup> | 0.51 ± 0.11* <sup>&amp;</sup> | 0.20 ± 0.06* <sup>&amp;</sup> | 1.16 ± 0.05 | 0.16 ± 0.05* <sup>&amp;</sup> | 1.11 ± 0.11* <sup>&amp;</sup> | 0.526 ± 0.052* <sup>&amp;</sup> | 0.174 ± 0.041* <sup>&amp;</sup> | 0.142 ± 0.035* <sup>&amp;</sup> |
| miR-130a inhibitors + si-PTEN | 1.47 ± 0.46                  | 0.74 ± 0.14                   | 1.63 ± 0.22                   | 0.64 ± 0.09                   | 1.16 ± 0.11 | 0.67 ± 0.14                   | 1.13 ± 0.13                   | 0.453 ± 0.026                   | 0.547 ± 0.032                   | 0.592 ± 0.058                   |
| miR-130a mimics + Wortmannin  | 0.61 ± 0.14*                 | 0.71 ± 0.13                   | 1.61 ± 0.16                   | 0.62 ± 0.08                   | 1.13 ± 0.10 | 0.66 ± 0.09                   | 1.09 ± 0.09                   | 0.444 ± 0.066                   | 0.551 ± 0.047                   | 0.602 ± 0.037                   |

HCY: Homocysteine; HCAECs: Coronary artery endothelial cells; TEN; Phosphatase and tensin homolog; PI3K, Phosphatidylinositol 3-kinase; Akt, Protein kinase B; eNOS, endothelial nitric oxide synthase; \*: compared with the blank and the NC groups,  $P < 0.05$ ; #: compared with the miR-130a inhibitors+ si-PTEN group,  $P < 0.05$ ; &: compared with the miR-130a mimics + Wortmannin,  $P < 0.05$ .

concentration of NO was increased in the miR-130a mimics group while was decreased in the Wortmannin group (both  $P < 0.05$ ).

### Comparisons of serum cytokine levels in HCAECs among eight groups

There was no significant difference in the concentrations of IL-6, ICAM-1, IFN- $\gamma$ , IL-1 $\beta$ , TNF- $\alpha$ , IL-12 and IL-17 between the blank and the NC groups (all  $P > 0.05$ ). Compared with the blank and the NC groups, the concentrations of IL-6, ICAM-1, IFN- $\gamma$ , IL-1 $\beta$ , TNF- $\alpha$ , IL-12 and IL-17 were decreased in the miR-130a mimics and the si-PTEN groups while were increased in the miR-130a inhibitors and the Wortmannin groups (all  $P < 0.05$ ). No significant difference was found in the concentrations of these inflammatory factors between the miR-130a inhibitors + si-PTEN and the miR-130a mimics +Wortmannin groups (all  $P > 0.05$ ). The concentrations of these inflammatory factors in the miR-130a inhibitors group were higher than those in the miR-130a inhibitors + si-PTEN group, and in the si-PTEN group were lower than those in the miR-130a inhibitors + si-PTEN group

(all  $P < 0.05$ ). The concentrations of these inflammatory factors in the miR-130a mimics group were lower than those in the miR-130a mimics + Wortmannin group, and in the Wortmannin group were higher than those in the miR-130a mimics + Wortmannin group (all  $P < 0.05$ ) (Table 4).

### DISCUSSION

In the present study, we focused on the mechanisms of miR-130a regulating PI3K/Akt/eNOS signaling pathway in HCAECs injury and inflammatory responses. Our study demonstrated that miR-130a activates PI3K/Akt/eNOS signaling pathway to reduce the HCAECs injury and inflammatory responses by down-regulating PTEN.

In our study, we successfully used HCY to induce HCAEC injury and HCAEC-mediated inflammatory responses. HCY, an asulphur-containing endogenous amino acid, is produced in the methylation cycle of protein metabolism and participated in maintaining the cells redox balance [21]. HCY can directly or indirectly lead to vascular endothelial cell injury, promote the proliferation of vascular smooth muscle cells, affect the oxidation of low density lipoprotein, enhance platelet

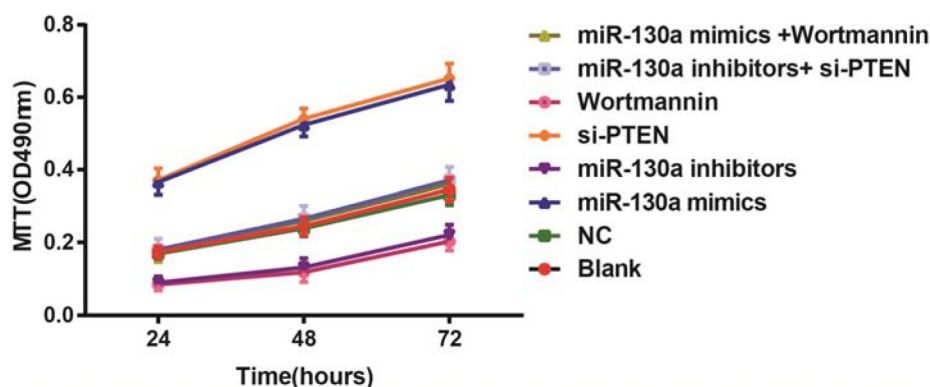

**Figure 9: Comparisons of the proliferation of HCAECs among eight groups.** Note: HCAECs, Human coronary artery endothelial cells.



**Table 4: The concentrations of cytokines in each group**

| Group                        | IL-6(ng/ml)                     | ICAM-1 (ng/ml)                 | IFN-γ(pg/ml)                    | IL-1β(pg/ml)                  | TNF-α (pg/ml)                  | IL-12(pg/ml)                     | IL-17(pg/ml)                     |
|------------------------------|---------------------------------|--------------------------------|---------------------------------|-------------------------------|--------------------------------|----------------------------------|----------------------------------|
| Blank                        | 57.88 ± 7.66                    | 21.33 ± 3.64                   | 70.15 ± 5.01                    | 2.27 ± 0.59                   | 11.56 ± 3.73                   | 235.24 ± 10.52                   | 312.76 ± 24.18                   |
| NC                           | 56.06 ± 8.15                    | 20.59 ± 3.26                   | 70.43 ± 4.92                    | 2.16 ± 0.61                   | 12.35 ± 4.03                   | 236.98 ± 11.25                   | 330.09 ± 28.51                   |
| miR-130a mimics              | 32.59 ± 6.45* <sup>&amp;</sup>  | 8.55 ± 1.67* <sup>&amp;</sup>  | 49.66 ± 4.27* <sup>&amp;</sup>  | 1.04 ± 0.49* <sup>&amp;</sup> | 4.86 ± 1.09* <sup>&amp;</sup>  | 135.06 ± 15.70* <sup>&amp;</sup> | 217.32 ± 22.19* <sup>&amp;</sup> |
| miR-130a inhibitors          | 102.15 ± 8.60* <sup>#</sup>     | 36.78 ± 6.55* <sup>#</sup>     | 134.72 ± 7.48* <sup>#</sup>     | 3.71 ± 0.89* <sup>#</sup>     | 24.05 ± 3.99* <sup>#</sup>     | 398.71 ± 30.14* <sup>#</sup>     | 566.38 ± 37.21* <sup>#</sup>     |
| si-PTEN                      | 29.94 ± 5.87* <sup>#</sup>      | 8.02 ± 1.59* <sup>#</sup>      | 46.23 ± 4.60* <sup>#</sup>      | 0.96 ± 0.45* <sup>#</sup>     | 4.09 ± 0.92* <sup>#</sup>      | 129.57 ± 16.18* <sup>#</sup>     | 211.66 ± 21.27* <sup>#</sup>     |
| Wortmannin                   | 109.64 ± 8.89* <sup>&amp;</sup> | 40.25 ± 6.24* <sup>&amp;</sup> | 145.80 ± 7.19* <sup>&amp;</sup> | 3.76 ± 0.95* <sup>&amp;</sup> | 26.73 ± 3.87* <sup>&amp;</sup> | 418.66 ± 28.37* <sup>&amp;</sup> | 582.49 ± 34.52* <sup>&amp;</sup> |
| miR-130a inhibitors+ si-PTEN | 54.20 ± 7.91                    | 21.91 ± 3.72                   | 72.08 ± 4.67                    | 2.11 ± 0.58                   | 10.69 ± 3.45                   | 227.47 ± 11.60                   | 328.12 ± 25.68                   |
| miR-130a mimics + Wortmannin | 66.84 ± 6.79                    | 26.82 ± 4.11                   | 73.98 ± 5.45                    | 2.42 ± 0.68                   | 10.13 ± 1.70                   | 241.55 ± 20.18                   | 335.60 ± 29.76                   |

Notes: HCY, homocysteine; IL-6, interleukin-6; ICAM-1, Intercellular Adhesion Molecule 1; IFN-γ, interferon-γ; IL-1β, Interleukin-1β; TNF-α, interferon-α; IL-12, interleukin-12; IL-17, interleukin-17; HCAECs: human coronary artery endothelial cells; \*: compared with the blank and the NC groups,  $P < 0.05$ , #: compared with the miR-130a inhibitors+ si-PTEN group,  $P < 0.05$ ; &: compared with the miR-130a mimics + Wortmannin,  $P < 0.05$ .

function, and promote the formation of thrombosis [22]. A previous study has also indicated that HCY has been recognized as an independent risk factor for CHD, which can induce injuries and an inflammatory responses in cardiac endothelial cells [23]. We found that the NO concentrations were lower than those in the control group after treatment with different doses of HCY, and with increasing HCY concentrations, the IL-6 and ICAM-1 content in HCAECs increased gradually. HCY can generate reactive oxygen and a large number of radicals under oxidative stress, which can directly damage the endothelium, and the product can not only promote the degradation of NO but also inhibit the production and activity of nitric oxide synthase, which can cause the decreased synthesis of NO [24]. A study conducted by Dai et al. also revealed that HCY-induced reactive oxygen

species up-regulate the expression and translocation of redox factor 1 via NADPH oxidase, and then redox factor 1 increases nuclear factor-kappa B activity, monocyte chemoattractant protein-1 secretion by human monocytes/macrophages and the production of multiple inflammatory cytokines [25].

Subsequently, we conducted an experiment to investigate the effects of miR-130a on the PI3K/Akt/eNOS signaling pathway and concluded that the PI3K/Akt/eNOS signaling pathway was inhibited in HCAECs following HCY treatment after transfection with the miR-130a inhibitor. Previous evidence has shown that miR-130a suppresses PTEN expression, leading to the activation of PI3K/Akt signaling [26], which was consistent with our results. Finally, we found that miR-130a may activate PI3K/Akt/eNOS signaling pathway

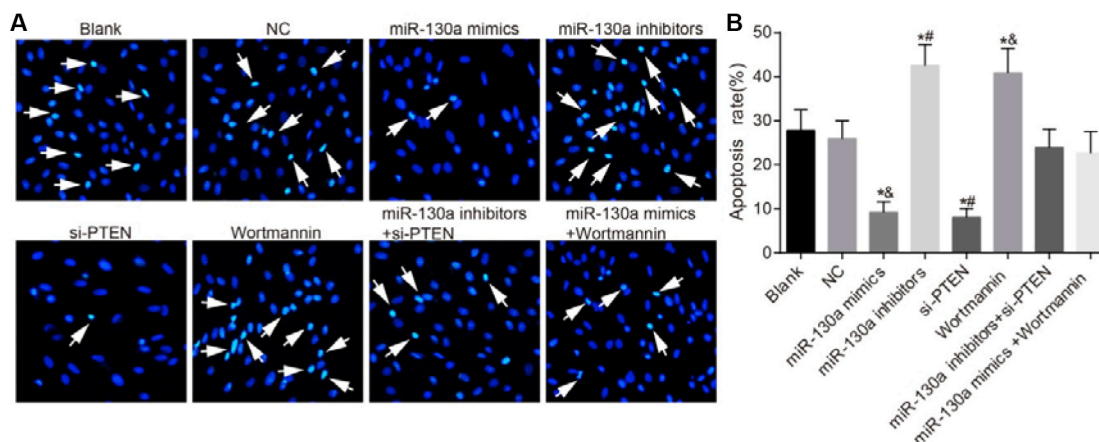

**Figure 10: Comparisons of the apoptosis of HCAECs among eight groups.** (A) A series of typical apoptosis characteristics of HCAECs, such as chromatin enrichment and apoptotic body after treating by difference concentrations of HCY ( $\times 200$ ); (B) The effects of HCY on apoptosis of HCAECs. Note: HCAECs, human coronary artery endothelial cells; NO, nitric oxide; \* $P < 0.05$  compared with the blank and the NC groups; # $P < 0.05$  compared with the miR-130a inhibitors + si-PTEN group; & $P < 0.05$  compared with the miR-130a mimics + Wortmannin group.

following HCY treatment, and then successfully induce HCAEC injury and HCAEC-mediated inflammatory responses. MiR-130a has recently emerged as a key miR that inhibits cancer cell proliferation, invasion and migration by targeting other cellular proteins that promote cell proliferation or have oncogenic potential [27]. PI3K, known as a heterodimeric enzyme, plays an important role in proliferation and apoptosis, while Akt, a downstream serine-threonine kinase, transmits survival signals from growth factors. It was reported that Akt can activate eNOS, which can cause the production of NO [28]. NO, an important messenger molecule, is closely related to the inflammatory responses, oxidative stress and cell proliferation [29]. It has been found that the PI3K/Akt/eNOS signaling pathway is involved in cell growth, proliferation, differentiation, movement, energy storage and metabolism [28]. Moreover, PI3K activation leads to the phosphorylation of AKT, which can activate its downstream target proteins, such as Bad, Caspase9, nuclear factor-kappa B and Bax, by phosphorylation, and then regulates the proliferation, differentiation, apoptosis and migration of ECs [30]. Previous evidence has also demonstrated that activated nuclear factor-kappa B can enter into the nucleus and combine with the target genes related to inflammation and the immune response, leading to the release of a large number of inflammatory factors, such as IL-6 and ICAM-1 [31, 32]. Angiopoietin-1

(Ang1), a strong activator of intracellular PI 3'-kinase/Akt, was also demonstrated that it may be useful as an inhibitor of TNF- $\alpha$ -induced inflammation and cancer progression [9]. PTEN is deemed as a tumor suppressor gene that negatively regulates PI3K/Akt signaling [33]. The suppression of PTEN has been proved to reduce myocardial ischemic injury through activation of PI3K/Akt signaling [34]. Previous study has claimed that miR-130a could down-regulate the expression of PTEN in ECs [35]. Moreover, a study conducted by Wu and colleagues clarified that vascular endothelial dysfunction was associated with the inhibition of the PI3K/Akt/eNOS signaling pathway [36]. Thus, we suspected that miR-130a may inhibit the PI3K/Akt/eNOS signaling pathway to cause HCAEC injury and HCAEC-mediated inflammatory responses.

In conclusion, we provide compelling evidence that miR-130a could alleviate HCAECs injury and inflammatory responses by down-regulating *PTEN* and activating PI3K/Akt/eNOS signaling pathway, which can provide a new target for the treatment of CHD at the gene level. However, due to the limitations of our funds and time of our study, mature miR-130a, pre-miR-130a and pri-miR-130a used for determining the functions of HCY on up-regulating miR-130a were not conducted. Thus, the underlying mechanism requires further investigation.

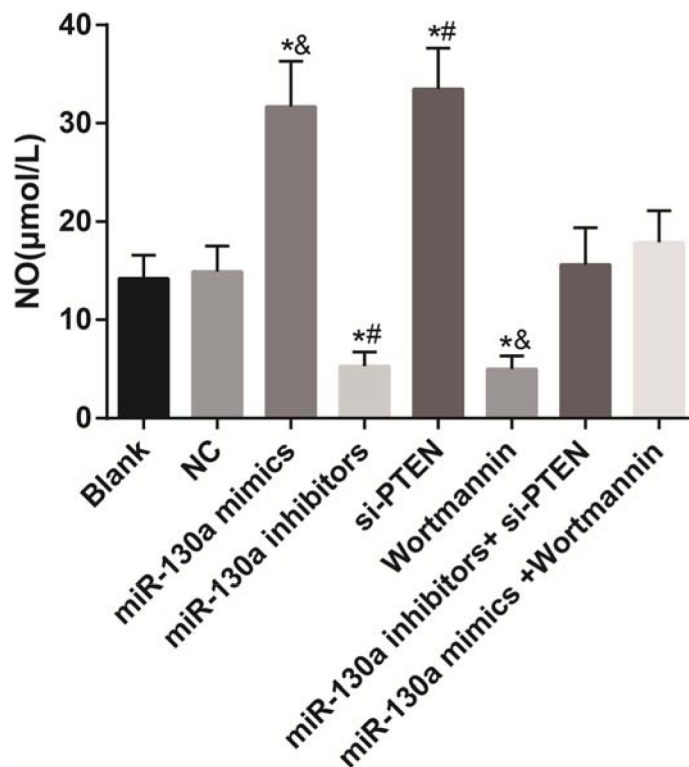

**Figure 11: The release of NO in HCAECs among eight groups.** Note: HCAECs, human coronary artery endothelial cells; NO, nitric oxide; \* $P < 0.05$  compared with the blank and the NC groups; # $P < 0.05$  compared with the miR-130a inhibitors + si-PTEN group; & $P < 0.05$  compared with the miR-130a mimics + Wortmannin group.

## MATERIALS AND METHODS

### Cell culture

Culture bottles containing human coronary artery endothelial cells (HCAECs, purchased from ScienCell Research Laboratories, Carlsbad, CA, USA) were wiped and disinfected with 70% alcohol and then cultured in an incubator for 2 h. After the cells adhered to the wall, the original culture medium was replaced by fresh culture medium for continuing culture, and the cell morphology was observed under a microscope. The morphology of the cultured cells was consistent with the characteristics of endothelial cells. When the cells grown over 90% of the culture bottle, the cells were subcultured and frozen for further experiments. All the cells were divided into two groups, the case and control groups. Phosphate buffered saline (PBS) (1 mL) was added to the control group, while different doses of HCY (0.1, 0.25, 0.5 and 1 mmol/L) were added to the case group at room temperature for 20 min (6 wells in each group). When the cells largely adhered to the wall (approximately 2–3 h), the corresponding treatment was continued for 24 hours in culture. Culture medium and culture bottle were purchased from Hyclone Laboratories (Logan, UT, USA).

### Cell transfection

HCAECs treated with HCY (1 mmol/L) were inoculated in a 50 ml culture bottle, and the cells grew to 30–50% density in complete culture medium. Lipofectamine 2000 and microRNA-130a inhibitor were prepared in sterile Eppendorf tubes. The Lipofectamine 2000 solution was prepared with 1 µl Lipofectamine 2000 + 50 µl serum-free medium and placed at room temperature for 5 min, and the miR-130a inhibitor was prepared with miR-130a inhibitors (20 pM) + 50 µl serum-free medium and placed at room temperature for 20 min. Diluted miR-130a inhibitor was used to form a complex with liposomes (total volume: 100 µl). Next, the complex was evenly mixed and added into the 50 ml culture bottle containing cells for transfection. Then, the mixture was placed in a 37°C, 5% CO<sub>2</sub> incubator. After culture for 6–8 h, the culture solution was changed to fresh complete culture medium for further culture for 24–48 h to gather the cells and extract the total protein. HCAECs in the logarithmic growth phase were divided into eight groups: the blank group (without any treatment), the negative control (NC) group (transfected with empty vector), the miR-130a mimics group (transfected with miR-130a analogue), the miR-130a inhibitors group (transfected with miR-130a inhibitors), the si-PTEN group (transfected with si-PTEN), the Wortmannin group (Wortmannin [a PI3K inhibitor] was incubated with the cells for 24 h), the miR-130a inhibitors + si-PTEN group (co-transfected with miR-130a inhibitors and si-PTEN) and the miR-130a

mimics + Wortmannin group (after transfection with miR-130a analogue for 6–8 h, the culture solution was changed to complete culture medium, and then Wortmannin was also incubated with the cells for 24 h).

### Luciferase reporter gene assay

DNA extraction was conducted based on operating specification of TIANamp Genomic DNA Kit (Tiangen Biotech, Beijing, China). After that, the luciferase reporter vector was constructed, and luciferase assay kit (Bright-Glo™ Luciferase Assay System) of Promega Corporation (Madison, Wisconsin, USA) was applied for testing the activity of luciferase. After the 293T cell (Human renal epithelial cell line) was transfected for 48 h, the old culture medium was discarded, followed by PBS washing for two times. After washing, each well was added with 100 µL Passive Lysis Buffer (PLB), followed by slightly shaken at room temperature for 15 min, and the cell lysis solution was gathered. The procedure was set to pre-read for 2 s and read for 10 s with per injection volume of LAR II Stop & Glo® Reagent was 100 µL. The prepared LAR II, Stop & Glo® reagent and the luminotron or lighting slab added into cell lysis solution were placed into biological luminescence detector. The procedure run and the data were saved after the end of the fluorescent reading.

### Real-time quantitative polymerase chain reaction (RT-qPCR)

The cell culture medium from a 6-well plate was placed into six centrifuge tubes and centrifuged at 1200 rpm for 10 min. The supernatant (500 ml) was used to extract RNA, and the total RNA was extracted using a miRNeasy Mini Kit (Qiagen, Dusseldorf, Germany). The RNA samples (5 µl) were diluted 20 times with ultrapure RNase-free water, and the absorption value was read at 260 nm and 280 nm on an ultraviolet spectrophotometer to test the concentration and purity of the RNA. An OD260/OD280 ratio between 1.7–2.1 indicated sufficient purity for follow-up experiments. The cDNA template was synthesized by reverse transcription using a PCR amplification instrument, and RT-qPCR was conducted with an ABI7500 quantitative PCR instrument. The reaction conditions were: pre-denaturing (95°C for 10 min) and then 40 cycles of denaturing (95°C for 10 s), annealing (60°C for 20 s), and elongation (72°C for 34 s). The primers used in the reaction are shown in Table 5. U6 was regarded as an internal reference of miR-130a, and β-actin was regarded as an internal reference of PTEN, PI3K, AKT and eNOS mRNA expressions. The 2<sup>-ΔΔCt</sup> method was used to represent the ratios of the target genes between the test group and the control group, and the formula was  $\Delta\Delta C_t = \Delta C_t_{\text{test group}} - \Delta C_t_{\text{control group}}$  and  $\Delta C_t = C_t_{\text{target gene}} - C_t_{\text{inference gene}}$ . C<sub>t</sub> was the number

**Table 5: Primer sequences of genes**

| Gene          | Forward primer                | Reverse primer                 |
|---------------|-------------------------------|--------------------------------|
| microRNA-130a | 5'-CAGTGCAATGTTAAAAGGGCAT-3'  | 5'-TAGAGTGAGTGTAGCGAGCA-3'     |
| U6            | 5'-GCTTCGGCAGCACATACTAAAAT-3' | 5'-CGCTTCACGAATTTGCGTGTTCAT-3' |
| PTEN          | TGGAAAGGGACGAACTGGTG          | CATAGCGCCTCTGACTGGGA           |
| PI3K          | CCACGACCATCATCAGGTGAA         | CCTCACGGAGGCATTCTAAAGT         |
| AKT           | ACGATGAATGAGGT GTCTGT         | TCTGCTACGGTGAAGTTGTT           |
| eNOS          | TGACCCTCACCGATAACA            | TCTGGCCTTCTGCTCATTTT           |
| β-actin       | 5'-CCTGTACGCCAACACAGTGC-3'    | 5'-ATACTCCTGCTTGCTGATCC-3'     |

Notes: PTEN, Phosphatase and tensin homolog; PI3K, Phosphatidylinositol 3-kinase; Akt, Protein kinase B; eNOS, endothelial nitric oxide synthase.

of amplification cycles that had occurred when the real-time fluorescence intensity of the reaction reached the set threshold. The experiment was conducted in triplicate.

### Western blotting

After removing the cultured cells, the cells were washed with pre-cooled PBS buffer for 3 times. After washing, lysis buffer (RIPA Buffer of Pirece company) was added (100 µl/50 ml) to lyse the cells, and then the cells were placed on ice for 30 min, followed by a 12000 rpm centrifugation at 4°C for 10 min. Then, the supernatants were stored separately in 0.5 ml centrifuge tubes at -20°C. Bovine serum albumin (BSA) (2 µg/µl) was diluted in PBS successively at concentrations of 20 µg/µl, 15 µg/µl, 10 µg/µl, 5 µg/µl, 2.5 µg/µl and 0 µg/µl. After the amount of BCA detection reagent needed was calculated according to the number of samples, reagents A and B from the BCA kit (Pierce) were prepared at a 50:1 ratio. The lysates (2 µl) were diluted in double-distilled water (18 µl) (each sample in 2 wells). In a 96-well plate, 200 µl of detection solution were added to each well, and the diluted standard and samples to be tested were added to the wells (10µl/well), followed by light shaking. Then, the sample was incubated at 37°C for 30 min, cooled and placed at room temperature. The OD values of the samples were detected at a wavelength of 490, and the standard curve was drawn to calculate the concentrations of the proteins in each sample, and then the sample was stored at -70°C. The samples were first electrophoresed at 60 v, and then the voltage was changed to 120 v when the samples reached the separation gel, followed by electrophoresis (conducted at 4°C) for 1–2 h. After electrophoresis, the proteins weretransferred onto polyvinylidene fluoride (PVDF) membranes for 2 h (conducted at 4°C). The PVDF was removed from the transfer apparatus, and the samples were blocked with 5% evaporated milk in tris-buffered saline-tween (TBST) and incubated at room temperature for 1–2 h. Primary antibodies against PTEN (1:1000, A2B1, Santa Cruz Biotechnology, California), PI3K (1:1000, ab86714, abcam, USA), p-PI3K (1: 1,000, cs-4228, Cell Signaling, USA), Akt (1:1,000, cs- 9272, Cell Signaling,

USA), p-Akt (1:1,000, cs-9271, Cell Signaling, USA), eNOS (1:1000, ab76198, abcam, USA) and p-eNOS (1:500, ab76199, abcam, USA) were incubated with the samples at 4°C overnight, followed by three TBST washes (each time for 10 min). After washing, the corresponding secondary antibody (sheep anti rabbit secondary antibody labeled by HRP [1:5000, A0208, Beyotime, Shanghai, China]) was added and the membrane was incubated at room temperature for 1 h, followed by three TBST washes (each time for 10 min). The band was visualized by chemiluminescence, X-ray exposure, developing, and photographic fixing to analyze the data.

### Methyl thiazolyl-tetrazolium (MTT) assay

The cells in the logarithmic growth phase were extracted and washed twice with PBS. Then, the cells were digested with trypsin and suspended in a single-cell suspension using a pipette. A cell counter was used in our study. The cells were inoculated in 96-well plates with  $3 \times 10^3$ – $6 \times 10^3$  cells per well. The volume of added cells in each well was 200 µl, and six duplicate wells were used. The 96-well plate was placed in a 37°C, 5% CO<sub>2</sub> incubator and cultured for 24–72 h with the addition of MTT solution (20 µl, 5 mg/ml, Sigma, St. Louis, USA) for developing. Then, after 4 h of incubation in a 37°C, 5% CO<sub>2</sub> incubator, the cell culture was ended and the culture solution in the 96-well plate was discarded. Then, dimethyl sulfoxide (DMSO) (150 µl) was added to each well with light shaking for 10 min to promote the dissolution of crystals. The optical density (OD) values of each well were detected by enzyme-linked immunosorbent assay (ELISA) after 24 h, 48 h and 72 h. The MTT curve was drawn with the absorbance values as longitudinal coordinates and the intervals as horizontal ordinates. The experiment was conducted in triplicate.

### Hoechst 33258 staining

Sterile cover slips were placed in a 24-well plate, and the cells in the logarithmic growth phase were extracted and digested by 0.25% trypsin-0.02% ethylenediamine

tetraacetic acid (EDTA), followed by centrifugation. After centrifugation, the cells were resuspended in complete culture medium and inoculated in 24-well plates at 500  $\mu$ l per well ( $6 \times 10^5$ /well), followed by culture in a 37°C, 5% CO<sub>2</sub> incubator. After the cells adhered to the wall, the cover slips were taken out, washed three times with PBS, and fixed with 4% paraformaldehyde (Wuhan BOSTER Co. Ltd. [Wuhan, China]) for 15 min, followed by three PBS washes (each time for 5 min). Hoechst 33258 fluid (Sigma Company, USA) was used for staining at room temperature for 5 min, followed by distilled water washing and air drying. Under the fluorescence microscope, 5 high magnifications of each group were randomly selected. Pyknotic, enriched and lightened nuclei were deemed apoptotic nuclei. The number of apoptotic nuclei in 10 fields of view under the fluorescence microscope was counted based on the number of apoptotic nuclei appearing in every 200 nuclei.

### Detection the release of Nitric oxide (NO)

The cells in the logarithmic growth phase were extracted and digested with 0.25% trypsin-0.02% EDTA, followed by centrifugation. After centrifugation, the cells were suspended in complete culture medium and inoculated in 24-well plates at 500  $\mu$ l/well ( $6 \times 10^5$  cells per well), followed by culture in a 37°C, 5% CO<sub>2</sub> incubator. After the cells adhered to the wall, the NO secreted into the supernatant of the cell culture medium in each group was tested according to the operating steps of the NO kit (Shanghai Jining biological science and Technology Co., Ltd.). The computational formula was: NO content ( $\mu$ mol/L) = [(OD of determination tube)/(OD of blank tube)]  $\times$  standard concentration (100  $\mu$ mol/L)  $\times$  dilution factor of the sample before the test.

### ELISA assay

The cells in the logarithmic growth phase were extracted and digested with 0.25% trypsin-0.02% EDTA, followed by centrifugation. After centrifugation, the cells were resuspended in complete culture medium and inoculated in 6-well plates ( $1 \times 10^4$ /each well), followed by culture in a 37°C, 5% CO<sub>2</sub> incubator. After the cells adhered to the wall, the cell supernatant was gathered and centrifuged at 4°C to removing sediment, and then the supernatants were stored at -20°C. The concentrations of ICAM-1, IL-6, IFN- $\gamma$ , IL-1 $\beta$ , TNF- $\alpha$ , IL-12 and IL-17 in the cell supernatants were detected according to the kit instructions. The well-prepared cell supernatant to be tested was diluted to 500 times. After mixture, 100  $\mu$ l diluent and well-prepared titers were added into 96-well plate coated with antibody, respectively. Each group has three parallel wells and the liquid was discarded after incubation for 2 h. After washing, 200  $\mu$ l enzymes labeled

antibody was added and incubated for 2 h, followed by discard of the liquid. The 200  $\mu$ l chromogenic substrate was added in well for incubation at dark for 20 min, followed by the addition of 50  $\mu$ l stop buffer. The optical density (OD) value was tested at wavelength of 450 nm. The standard curve was drawn and the concentrations of cytokines were calculated. ICAM-1 and IL-6 kits were brought from Shenzhen Juying biotechnology company (Shenzhen, China), and IFN- $\gamma$ , IL-1 $\beta$ , TNF- $\alpha$ , IL-12 and IL-17 were brought from Invitrogen Corporation (Grand Island, New York, USA).

### Statistical analysis

All the data were processed using SPSS 18 statistical software (SPSS Inc, Chicago, IL, USA). Comparisons among multiple groups were using one-way analysis of variance (ANOVA), and comparison between two groups was using the Least Significant Difference (LSD) method.  $P < 0.05$  provided evidence of significant differences.

### ACKNOWLEDGMENTS

The study was supported by the following funds: National Natural Science Foundation of China Youth Science Fund (Grant number: 51103059); Natural Science Foundation of Jilin Province (Grant numbers: 201115071, 20140101054JC); Leading Talents and Team Project of Science and Technology Innovation in Middle and Young in Jilin Province (Grant number: 20150519025JH); Guiding Fund for Strategic Adjustment of Economic Structure Special Projects of Jilin Province (Grant number: 2015Y030-3); Science and Technology Research Projects of the 12th Five-Year Plan for Jilin Province Department of Education (Grant numbers: [2014] B016 and [2015] 524); Industrial technology research and development project of Jilin provincial industry innovation special fund project (part of high tech industry) (Grant number: 2016C044-2)

### CONFLICTS OF INTEREST

None.

### Authors' contributions

C.L.S., B.L., Y.F.S., N.L., Y.Y.Y., J.C.Z., X.X., J.P.W., Z.Z., J.G.L., Y.X.L., X.H.Z., J.D.W. designed the study, collated the data, developed the database, carried out data analyses. C.L.S., Y.F.S., N.L. produced the initial draft of the manuscript. Y.Y.Y., J.C.Z. contributed to drafting the manuscript. B.L. contributed to the revise the manuscript. All authors approved the final version of the manuscript.

## REFERENCES

1. Erdogdu O, Nathanson D, Sjöholm A, Nystrom T, Zhang Q. Exendin-4 stimulates proliferation of human coronary artery endothelial cells through eNOS-, PKA- and PI3K/Akt-dependent pathways and requires GLP-1 receptor. *Mol Cell Endocrinol.* 2010; 325:26–35.
2. Nishi J, Minamino T, Miyauchi H, Nojima A, Tateno K, Okada S, Orimo M, Moriya J, Fong GH, Sunagawa K, Shibuya M, Komuro I. Vascular endothelial growth factor receptor-1 regulates postnatal angiogenesis through inhibition of the excessive activation of Akt. *Circ Res.* 2008; 103:261–8.
3. Aghajanian A, Wittchen ES, Allingham MJ, Garrett TA, Burridge K. Endothelial cell junctions and the regulation of vascular permeability and leukocyte transmigration. *J Thromb Haemost.* 2008; 6:1453–60.
4. Kumar P, Shen Q, Pivetti CD, Lee ES, Wu MH, Yuan SY. Molecular mechanisms of endothelial hyperpermeability: implications in inflammation. *Expert Rev Mol Med.* 2009; 11:e19.
5. Celinski K, Dworzanski T, Fornal R, Korolczuk A, Madro A, Slomka M. Comparison of the anti-inflammatory and therapeutic actions of PPAR-gamma agonists rosiglitazone and troglitazone in experimental colitis. *J Physiol Pharmacol.* 2012; 63:631–40.
6. Zheng H, Fu G, Dai T, Huang H. Migration of endothelial progenitor cells mediated by stromal cell-derived factor-1alpha/CXCR4 via PI3K/Akt/eNOS signal transduction pathway. *J Cardiovasc Pharmacol.* 2007; 50:274–80.
7. Chung BH, Kim JD, Kim CK, Kim JH, Won MH, Lee HS, Dong MS, Ha KS, Kwon YG, Kim YM. Icaritin stimulates angiogenesis by activating the MEK/ERK- and PI3K/Akt/eNOS-dependent signal pathways in human endothelial cells. *Biochem Biophys Res Commun.* 2008; 376:404–8.
8. Guha M, Mackman N. The phosphatidylinositol 3-kinase-Akt pathway limits lipopolysaccharide activation of signaling pathways and expression of inflammatory mediators in human monocytic cells. *J Biol Chem.* 2002; 277:32124–32.
9. Kim I, Oh JL, Ryu YS, So JN, Sessa WC, Walsh K, Koh GY. Angiotensin-II negatively regulates expression and activity of tissue factor in endothelial cells. *FASEB J.* 2002; 16:126–8.
10. Zheng SL, Stevens VL, Wiklund F, Isaacs SD, Sun J, Smith S, Pruett K, Wiley KE, Kim ST, Zhu Y, Zhang Z, Hsu FC, Turner AR, et al. Two independent prostate cancer risk-associated Loci at 11q13. *Cancer Epidemiol Biomarkers Prev.* 2009; 18:1815–20.
11. Chen Y, Gorski DH. Regulation of angiogenesis through a microRNA (miR-130a) that down-regulates antiangiogenic homeobox genes GAX and HOXA5. *Blood.* 2008; 111:1217–26.
12. Osbourne A, Calway T, Broman M, McSharry S, Earley J, Kim GH. Downregulation of connexin43 by microRNA-130a in cardiomyocytes results in cardiac arrhythmias. *J Mol Cell Cardiol.* 2014; 74:53–63.
13. Meng S, Cao J, Zhang X, Fan Y, Fang L, Wang C, Lv Z, Fu D, Li Y. Downregulation of microRNA-130a contributes to endothelial progenitor cell dysfunction in diabetic patients via its target Runx3. *PLoS One.* 2013; 8:e68611.
14. Xiao F, Yu J, Liu B, Guo Y, Li K, Deng J, Zhang J, Wang C, Chen S, Du Y, Lu Y, Xiao Y, Zhang Z, et al. A novel function of microRNA 130a-3p in hepatic insulin sensitivity and liver steatosis. *Diabetes.* 2014; 63:2631–42.
15. Pan Y, Wang R, Zhang F, Chen Y, Lv Q, Long G, Yang K. MicroRNA-130a inhibits cell proliferation, invasion and migration in human breast cancer by targeting the RAB5A. *Int J Clin Exp Pathol.* 2015; 8:384–93.
16. Li F, Chen Q, Song X, Zhou L, Zhang J. MiR-30b Is Involved in the Homocysteine-Induced Apoptosis in Human Coronary Artery Endothelial Cells by Regulating the Expression of Caspase 3. *Int J Mol Sci.* 2015; 16:17682–17695.
17. Mishra PK, Tyagi N, Kundu S, Tyagi SC. MicroRNAs are involved in homocysteine-induced cardiac remodeling. *Cell Biochem Biophys.* 2009; 55:153–162.
18. Kalani A, Kamat PK, Tyagi SC, Tyagi N. Synergy of homocysteine, microRNA, and epigenetics: a novel therapeutic approach for stroke. *Mol Neurobiol.* 2013; 48:157–168.
19. Maddika S, Kavela S, Rani N, Palicharla VR, Pokorny JL, Sarkaria JN, Chen J. WWP2 is an E3 ubiquitin ligase for PTEN. *Nat Cell Biol.* 2011; 13:728–33.
20. Song MS, Carracedo A, Salmena L, Song SJ, Egia A, Malumbres M, Pandolfi PP. Nuclear PTEN regulates the APC-CDH1 tumor-suppressive complex in a phosphatase-independent manner. *Cell.* 2011; 144:187–99.
21. Bukharaeva E, Shakirzyanova A, Khuzakhmetova V, Sitdikova G, Giniatullin R. Homocysteine aggravates ROS-induced depression of transmitter release from motor nerve terminals: potential mechanism of peripheral impairment in motor neuron diseases associated with hyperhomocysteinemia. *Front Cell Neurosci.* 2015; 9:391.
22. Fang K, Chen Z, Liu M, Peng J, Wu P. Apoptosis and calcification of vascular endothelial cell under hyperhomocysteinemia. *Med Oncol.* 2015; 32:403.
23. Clarke R, Halsey J, Bennett D, Lewington S. Homocysteine and vascular disease: review of published results of the homocysteine-lowering trials. *J Inherit Metab Dis.* 2011; 34:83–91.
24. Kassab A, Piwowar A. Cell oxidant stress delivery and cell dysfunction onset in type 2 diabetes. *Biochimie.* 2012; 94:1837–48.
25. Dai J, Li W, Chang L, Zhang Z, Tang C, Wang N, Zhu Y, Wang X. Role of redox factor-1 in hyperhomocysteinemia-accelerated atherosclerosis. *Free Radic Biol Med.* 2006; 41:1566–77.
26. Lu C, Wang X, Ha T, Hu Y, Liu L, Zhang X, Yu H, Miao J, Kao R, Kalbfleisch J, Williams D, Li C. Attenuation of cardiac dysfunction and remodeling of myocardial infarction by microRNA-130a are mediated by suppression

- of PTEN and activation of PI3K dependent signaling. *J Mol Cell Cardiol.* 2015; 89:87–97.
27. Li Y, Challagundla KB, Sun XX, Zhang Q, Dai MS. MicroRNA-130a associates with ribosomal protein L11 to suppress c-Myc expression in response to UV irradiation. *Oncotarget.* 2015; 6:1101–14. doi: 10.18632/oncotarget.2728.
  28. Ma P, Gu B, Xiong W, Tan B, Geng W, Li J, Liu H. Glimepiride promotes osteogenic differentiation in rat osteoblasts via the PI3K/Akt/eNOS pathway in a high glucose microenvironment. *PLoS One.* 2014; 9:e112243.
  29. Yu J, Yao H, Gao X, Zhang Z, Wang JF, Xu SW. The role of nitric oxide and oxidative stress in intestinal damage induced by selenium deficiency in chickens. *Biol Trace Elem Res.* 2015; 163:144–53.
  30. Shi H, Feng JM. Aristolochic acid induces apoptosis of human umbilical vein endothelial cells *in vitro* by suppressing PI3K/Akt signaling pathway. *Acta Pharmacol Sin.* 2011; 32:1025–30.
  31. Zhang J, Wu H, Li P, Zhao Y, Liu M, Tang H. NF-kappaB-modulated miR-130a targets TNF-alpha in cervical cancer cells. *J Transl Med.* 2014; 12:155.
  32. Chen HW, Lin AH, Chu HC, Li CC, Tsai CW, Chao CY, Wang CJ, Lii CK, Liu KL. Inhibition of TNF-alpha-Induced Inflammation by andrographolide via down-regulation of the PI3K/Akt signaling pathway. *J Nat Prod.* 2011; 74:2408–13.
  33. Oudit GY, Sun H, Kerfant BG, Crackower MA, Penninger JM, Backx PH. The role of phosphoinositide-3 kinase and PTEN in cardiovascular physiology and disease. *J Mol Cell Cardiol.* 2004; 37:449–71.
  34. Keyes KT, Xu J, Long B, Zhang C, Hu Z, Ye Y. Pharmacological inhibition of PTEN limits myocardial infarct size and improves left ventricular function postinfarction. *Am J Physiol Heart Circ Physiol.* 2010; 298:H1198–208.
  35. Yang L, Li N, Wang H, Jia X, Wang X, Luo J. Altered microRNA expression in cisplatin-resistant ovarian cancer cells and upregulation of miR-130a associated with MDR1/P-glycoprotein-mediated drug resistance. *Oncol Rep.* 2012; 28:592–600.
  36. Wu J, Lei MX, Xie XY, Liu L, She YM, Mo J, Wang S. Rosiglitazone inhibits high glucose-induced apoptosis in human umbilical vein endothelial cells through the PI3K/Akt/eNOS pathway. *Can J Physiol Pharmacol.* 2009; 87:549–55.
